# Supplementary material
Source: PubMed Central journal article supplement (PMC419623)
Supplement: nar_32_9_e72__2.pdf [file nar_32_9_e72__2.pdf]

## Supporting Table S1. Molecular beacons used in transcription reactions

|      |                                    |                                                                                            |
|------|------------------------------------|--------------------------------------------------------------------------------------------|
| MB-A | deoxyribonucleotide backbone       | 5' fluorescein – <u>CGCTCG</u> CTCCCCGACCCAATTTCCACCTTCA <u>CGAGCG</u> – dabcy1 3'         |
| MB-B | deoxyribonucleotide backbone       | 5' fluorescein – <u>GCGAGC</u> TCCTCCAGGCCATGCGCAAATACTC <u>GCTCGC</u> – dabcy1 3'         |
| MB-C | deoxyribonucleotide backbone       | 5' fluorescein – <u>GCGAGC</u> AAAGGACCAGGCGCAACTAAATTCA <u>GCTCGC</u> – dabcy1 3'         |
| MB-D | deoxyribonucleotide backbone       | 5' fluorescein – <u>GCGAGC</u> CTGGGATTAATAAAAATAGTAAGAATGTATAGC <u>GCTCGC</u> – dabcy1 3' |
| MB-E | deoxyribonucleotide backbone       | 5' tetrachlorofluorescein – <u>CGAGC</u> TTTTCGATACCCCGGATGTCAT <u>GCTCGC</u> – dabcy1 3'  |
| MB-F | deoxyribonucleotide backbone       | 5' fluorescein – <u>CGCAC</u> TCTGGTCTAAAAGTTTATT <u>GTGCG</u> – dabcy1 3'                 |
| MB-G | deoxyribonucleotide backbone       | 5' tetrachlorofluorescein – <u>CGCACC</u> TCTGGTCTAAAAGTTTATT <u>GGTGCG</u> – dabcy1 3'    |
| MB-H | deoxyribonucleotide backbone       | 5' fluorescein – <u>CCGACG</u> CCGACAGCGGGTTGTT <u>CGTCGG</u> – dabcy1 3'                  |
| MB-I | deoxyribonucleotide backbone       | 5' fluorescein – <u>CGCTCG</u> TTTTTTTTTTTTTTTTTTTT <u>CGAGCG</u> – dabcy1 3'              |
| MB-J | deoxyribonucleotide backbone       | 5' tetrachlorofluorescein – <u>CGCACC</u> GAAATGACTGAACGTCCGATA <u>GGTGCG</u> – dabcy1 3'  |
| MB-K | 2'-O-methylribonucleotide backbone | 5' tetrachlorofluorescein – <u>CGAGC</u> UCAGCUGGCUGGUGC <u>GCUCG</u> – dabcy1 3'          |
| MB-L | 2'-O-methylribonucleotide backbone | 5' fluorescein – <u>CCACG</u> CUUGUGGGUCAACCCC <u>CGUGG</u> – dabcy1 3'                    |
| MB-M | 2'-O-methylribonucleotide backbone | 5' tetrachlorofluorescein – <u>CGUC</u> UGUCUUUAGGUCUGGUCU <u>GACG</u> – dabcy1 3'         |
| MB-N | 2'-O-methylribonucleotide backbone | 5' tetrachlorofluorescein – <u>CGCU</u> CCAGUGCAUGCAGGGCC <u>AGCG</u> – dabcy1 3'          |
| MB-O | 2'-O-methylribonucleotide backbone | 5' tetrachlorofluorescein – <u>CGCU</u> AUCAAUGAGGAAGCUGCAGAAUGGGA <u>AGCG</u> – dabcy1 3' |
| MB-P | 2'-O-methylribonucleotide backbone | 5' tetrachlorofluorescein – <u>CCAG</u> GGAAGCUGCAGAAUGGGA <u>CUGG</u> – dabcy1 3'         |
| MB-Q | 2'-O-methylribonucleotide backbone | 5' tetrachlorofluorescein – <u>CGCU</u> UUUUCGAUACCCCGGAUGUCAU <u>AGCG</u> – dabcy1 3'     |
| MB-R | 2'-O-methylribonucleotide backbone | 5' fluorescein – <u>CGAGC</u> UUUUCGAUACCCCGGAUGUCAU <u>GCUCG</u> – dabcy1 3'              |
