# Supplementary material
Source: PubMed Central journal article supplement (PMC419623)

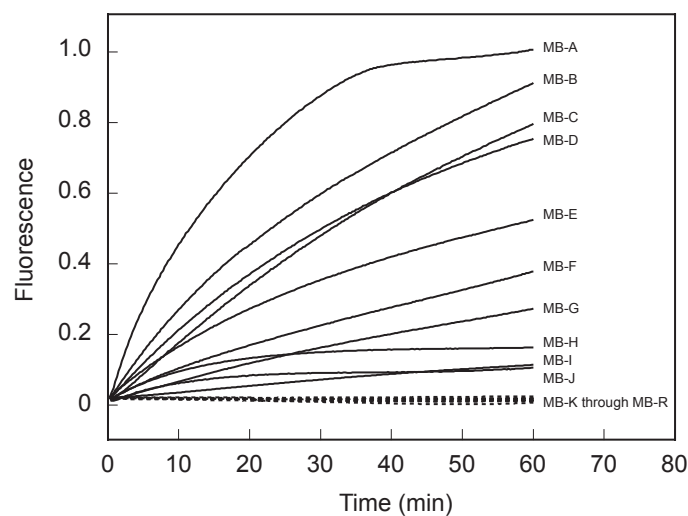

Supplement: nar_32_9_e72__1.pdf [file nar_32_9_e72__1.pdf]
